# Supplementary material for: Mechano-chemical activation of the (3LiBH4 + TiF3) system, its dehydrogenation behavior and the effects of ultrafine filamentary Ni and graphene additives
Source: Royal Society of Chemistry journal article supplement (doi:10.1039/c6ra21539d), 2016-01-01
Supplement: c6ra21539d1.pdf [file c6ra21539d1.pdf]

[Electronic Supplementary Information]

**Mechano-chemical activation of the (3LiBH<sub>4</sub>+TiF<sub>3</sub>) system, its dehydrogenation behavior and the effects of ultrafine filamentary Ni and graphene additives**

Amirreza Shirani Bidabadi<sup>1</sup>, Robert A. Varin<sup>1\*</sup>, Marek Polanski<sup>2</sup>, Leszek Stobinski<sup>3</sup>

<sup>1</sup>*Department of Mechanical and Mechatronics Engineering and Waterloo Institute for Nanotechnology, University of Waterloo, 200 University Ave. W., Waterloo, Ontario, Canada N2L 3G1*

<sup>2</sup>*Faculty of Advanced Technology and Chemistry, Military University of Technology, 2 Kaliskiego Str., 00-908 Warsaw, Poland*

<sup>3</sup>*Faculty of Materials Science and Engineering, Graphene Laboratory, Warsaw University of Technology, Warynskiego 1, 00-645 Warsaw, Poland,*

---

\*Corresponding author: E-mail address: [robert.varin@uwaterloo.ca](mailto:robert.varin@uwaterloo.ca)

Table 1S. Summary of hydrogen quantities desorbed due to mechanical and thermal dehydrogenation. The numbers in parenthesis indicate the time for thermal dehydrogenation in hours (h).

| Sample                                                            | H <sub>2</sub> desorbed during BM (wt.%) | H <sub>2</sub> desorbed at 60°C (wt.%(h)) | H <sub>2</sub> desorbed at 85°C (wt.%(h)) | H <sub>2</sub> desorbed at 100°C (wt.%(h)) | H <sub>2</sub> desorbed at 120°C (wt.%(h)) | H <sub>2</sub> desorbed at 200°C (wt.%(h)) | Total H <sub>2</sub> desorbed during BM and at 200°C (wt.%) |
|-------------------------------------------------------------------|------------------------------------------|-------------------------------------------|-------------------------------------------|--------------------------------------------|--------------------------------------------|--------------------------------------------|-------------------------------------------------------------|
| <b>(3LiBH<sub>4</sub>+TiF<sub>3</sub>)-1h BM</b>                  | 1.35                                     | 4.52 (93.2)                               | 4.85 (23.6)                               | 5.30 (25)                                  | 5.52 (23.15)                               | 5.81 (21.3)                                | 7.16                                                        |
| <b>(3LiBH<sub>4</sub>+TiF<sub>3</sub>)-5h BM</b>                  | 1.58                                     | 4.73 (44)                                 | 4.83 (24.6)                               | 5.04 (65)                                  | 5.29 (23.5)                                | 5.58 (19.5)                                | 7.16                                                        |
| <b>(3LiBH<sub>4</sub>+TiF<sub>3</sub>)+5 wt.% Ni-1h BM</b>        | 1.42                                     | 4.42 (44.7)                               | 5.18 (96.2)                               | 5.01 (24.8)                                | 5.05 (20.3)                                | 5.62 (23.5)                                | 7.04                                                        |
| <b>(3LiBH<sub>4</sub>+TiF<sub>3</sub>)+5 wt.% Ni-5h BM</b>        | 1.97                                     | 3.92 (49.5)                               | 4.52 (41)                                 | 4.82 (22.8)                                | 5.27 (29.2)                                | 5.39 (21.7)                                | 7.36                                                        |
| <b>(3LiBH<sub>4</sub>+TiF<sub>3</sub>)+5 wt.% graphene- 1h BM</b> | 0.87                                     | 3.62 (47)                                 | 4.78 (93.5)                               | 4.87 (26.2)                                | 5.08 (18.9)                                | 6.02 (22)                                  | 6.89                                                        |
| <b>(3LiBH<sub>4</sub>+TiF<sub>3</sub>)+5 wt.% graphene- 5h BM</b> | 2.38                                     | 2.98 (39.3)                               | 2.96 (90.9)                               | 2.45 (22.8)                                | 2.86 (25.1)                                | 2.84 (24)                                  | 5.22                                                        |

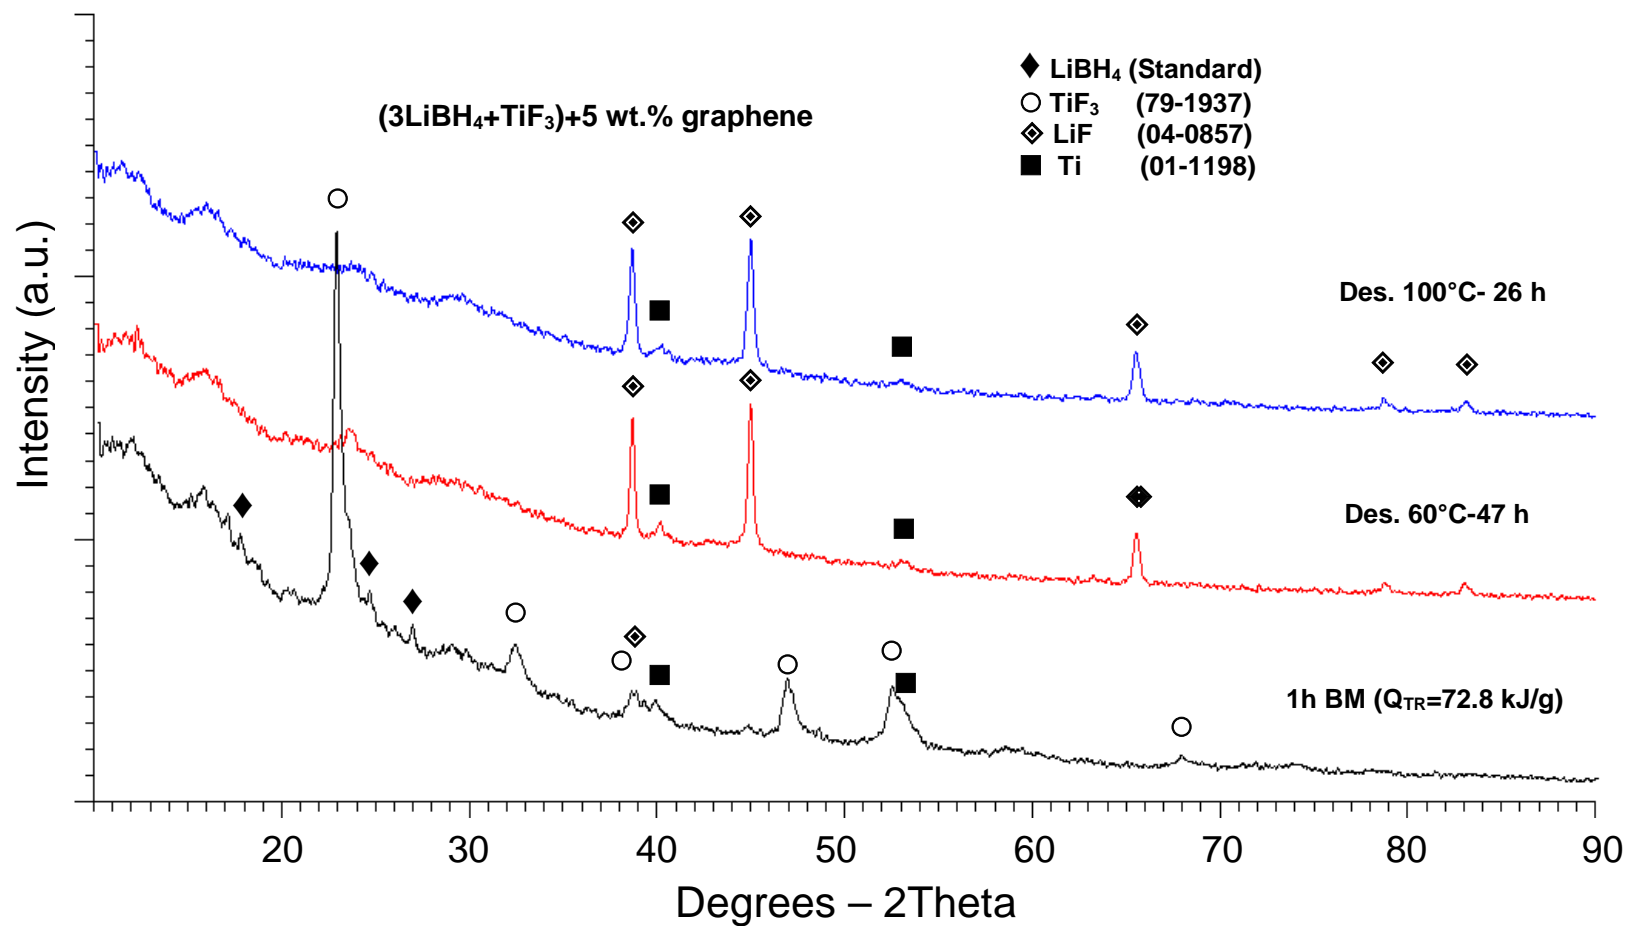

**Fig. 1S.** XRD patterns after ball milling (BM) and isothermal dehydrogenation at different temperatures for 3LiBH<sub>4</sub>+TiF<sub>3</sub>+5 wt.% graphene with an energy input,  $Q_{TR}=72.8$  kJ/g (1h BM).

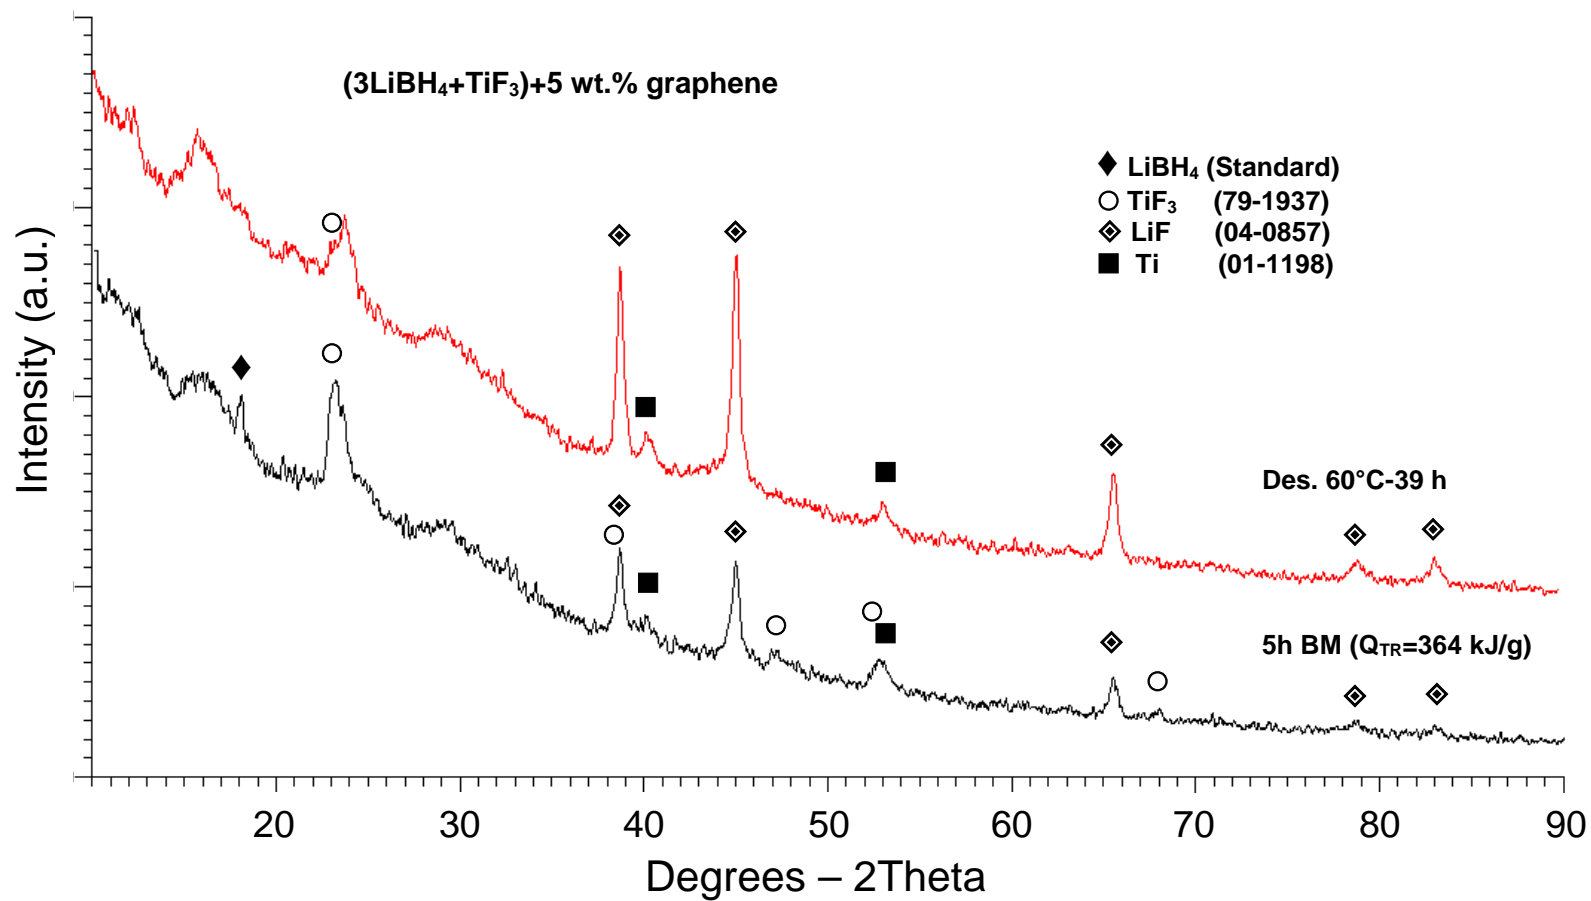

**Fig. 2S.** XRD patterns after ball milling (BM) and isothermal dehydrogenation at different temperatures for 3LiBH<sub>4</sub>+TiF<sub>3</sub>+5 wt.% graphene with an energy input, Q<sub>TR</sub>=364 kJ/g (5h BM).

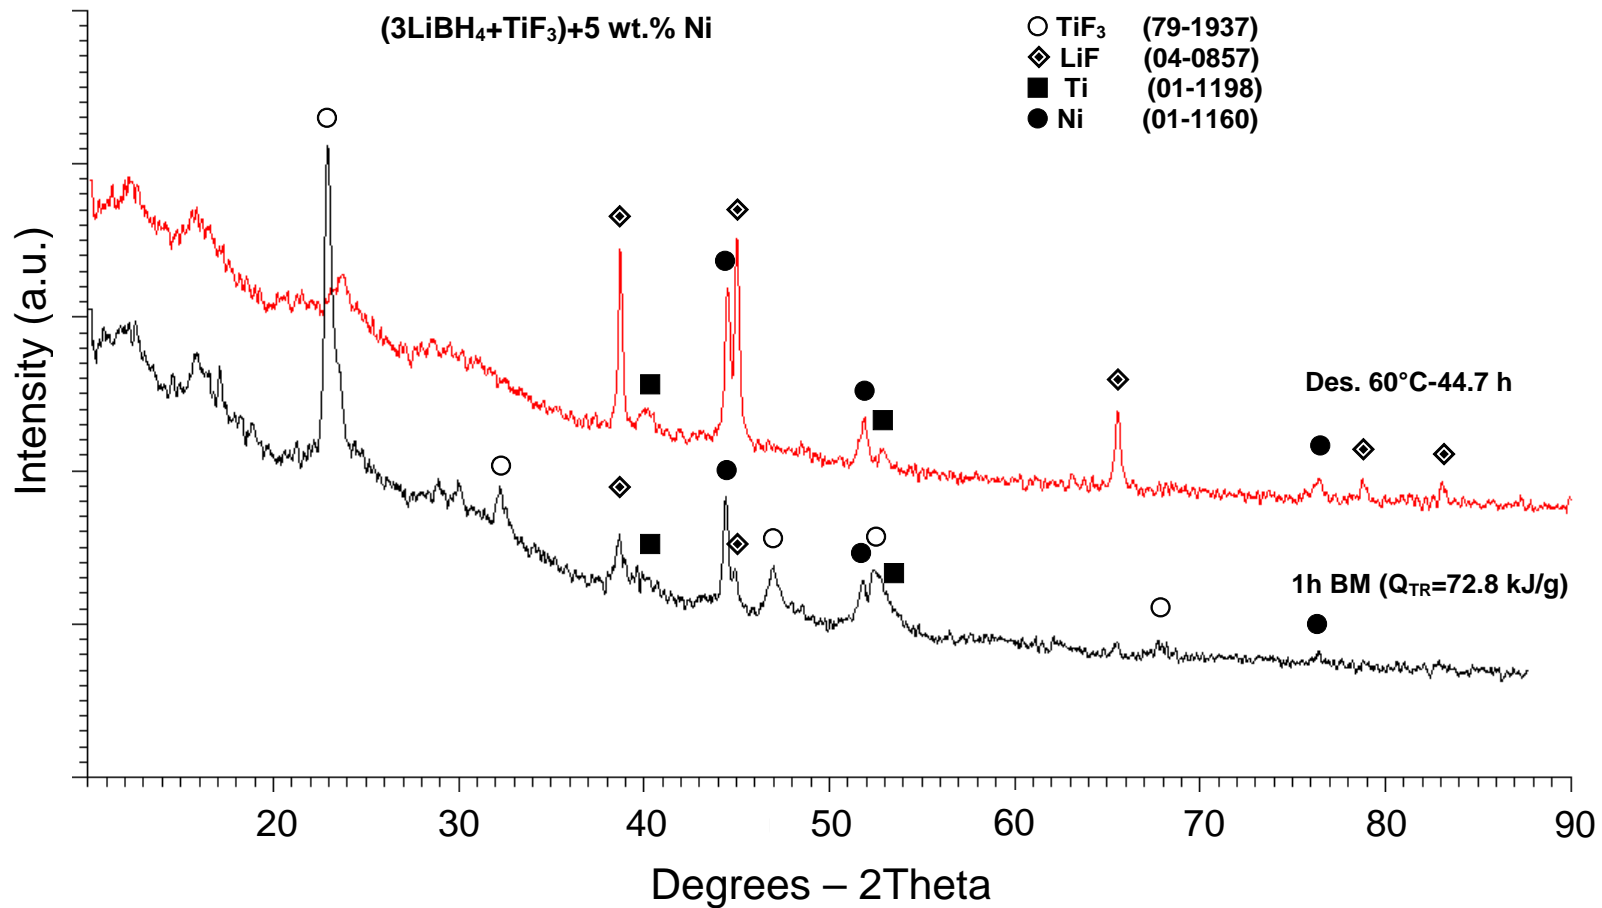

**Fig. 3S.** XRD patterns after ball milling (BM) and isothermal dehydrogenation at different temperatures for 3LiBH<sub>4</sub>+TiF<sub>3</sub>+5wt.% Ni with an energy input,  $Q_{TR}=72.8$  kJ/g (1h BM)

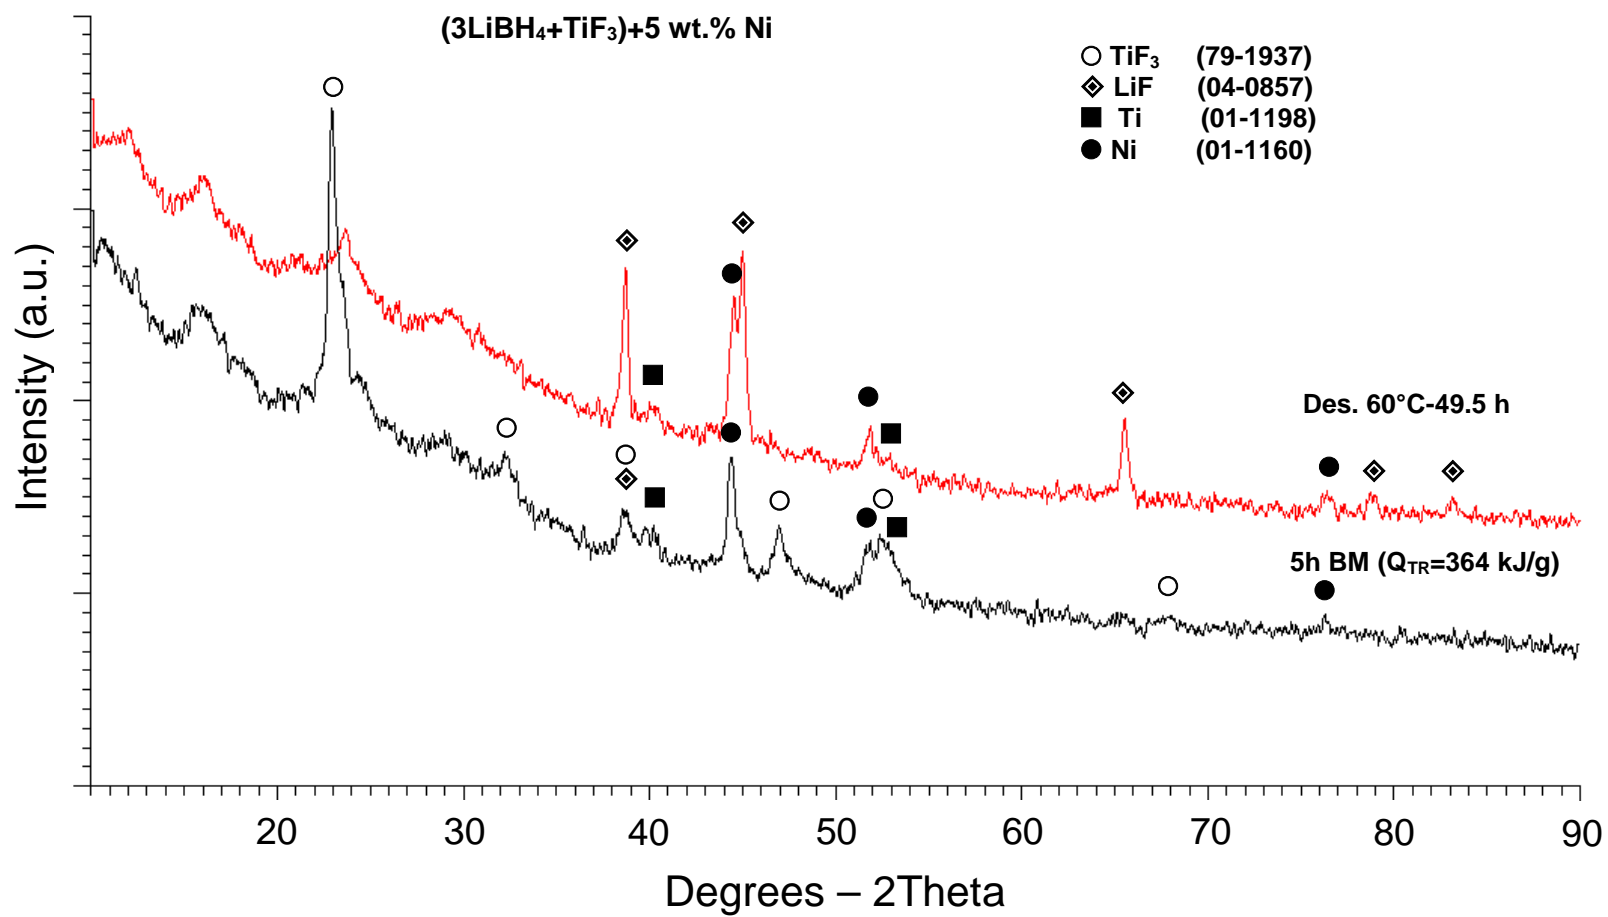

**Fig. 4S.** XRD patterns after ball milling (BM) and isothermal dehydrogenation at different temperatures for 3LiBH<sub>4</sub>+TiF<sub>3</sub>+5wt.% Ni with an energy input,  $Q_{TR}=364$  kJ/g (5h BM).
